# Supplementary material for: Structure and mechanism of the Nap adhesion complex from the human pathogen Mycoplasma genitalium
Source: PubMed Central journal article supplement (PMC7280502; doi:10.1038/s41467-020-16511-2), 2020-06-08
Supplement: 41467_2020_16511_MOESM1_ESM.pdf [file 41467_2020_16511_MOESM1_ESM.pdf]

## **Supplementary Information**

### **Structure and mechanism of the Nap adhesion complex from the human pathogen *Mycoplasma genitalium***

David Aparicio, Margot P. Scheffer, Marina Marcos-Silva et al.

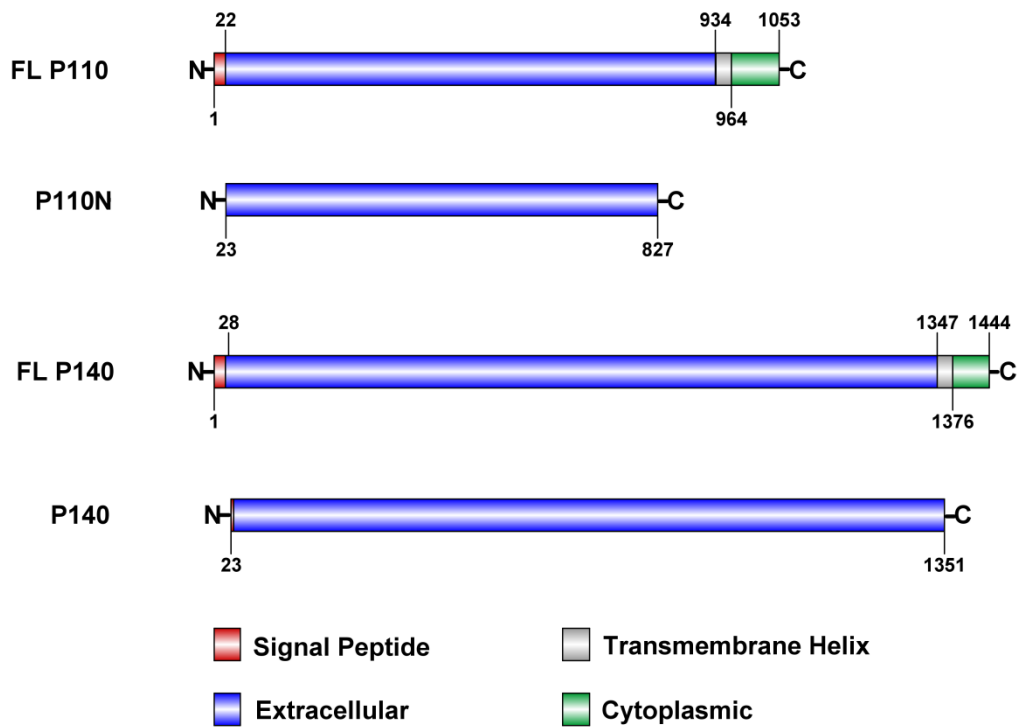

### Supplementary Figure 1. Proteins and constructs used in this study

The Psi-Pred server<sup>1</sup> was used to predict the location of signal peptides (red), extracellular regions (lilac), transmembrane helices (grey) and cytoplasmic regions (green) in the full length (FL) P140 and P110 proteins. Constructs of the extracellular regions of P140 and P110 are also shown. In P110N the C-domain was excluded. Numbers indicate the residues at the boundaries.

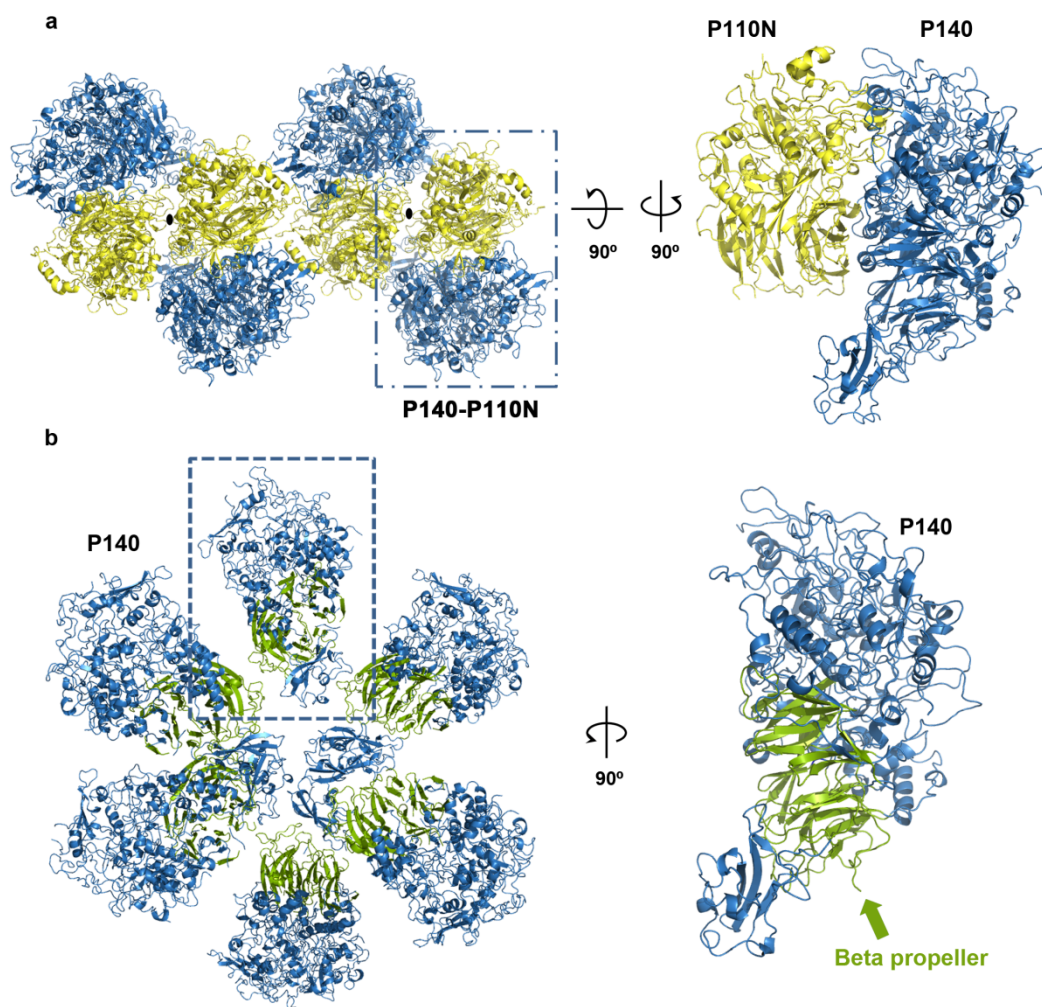

**Supplementary Figure 2. Asymmetric units content of P140-alone and P140-P110N crystals**

a) The P140-P110N crystals contain four P140-P110N heterodimers in the asymmetric unit that are arranged as two dimers with a local, non-crystallographic, two-fold axis (black oblong dots). The P140 construct (blue) includes the N- and C-domains, while the P110N construct (yellow) corresponds only to the N-domain of P110. b) The P140-alone crystals contain six P140 subunits in the asymmetric unit.  $\beta$ -propellers are explicitly indicated (green).

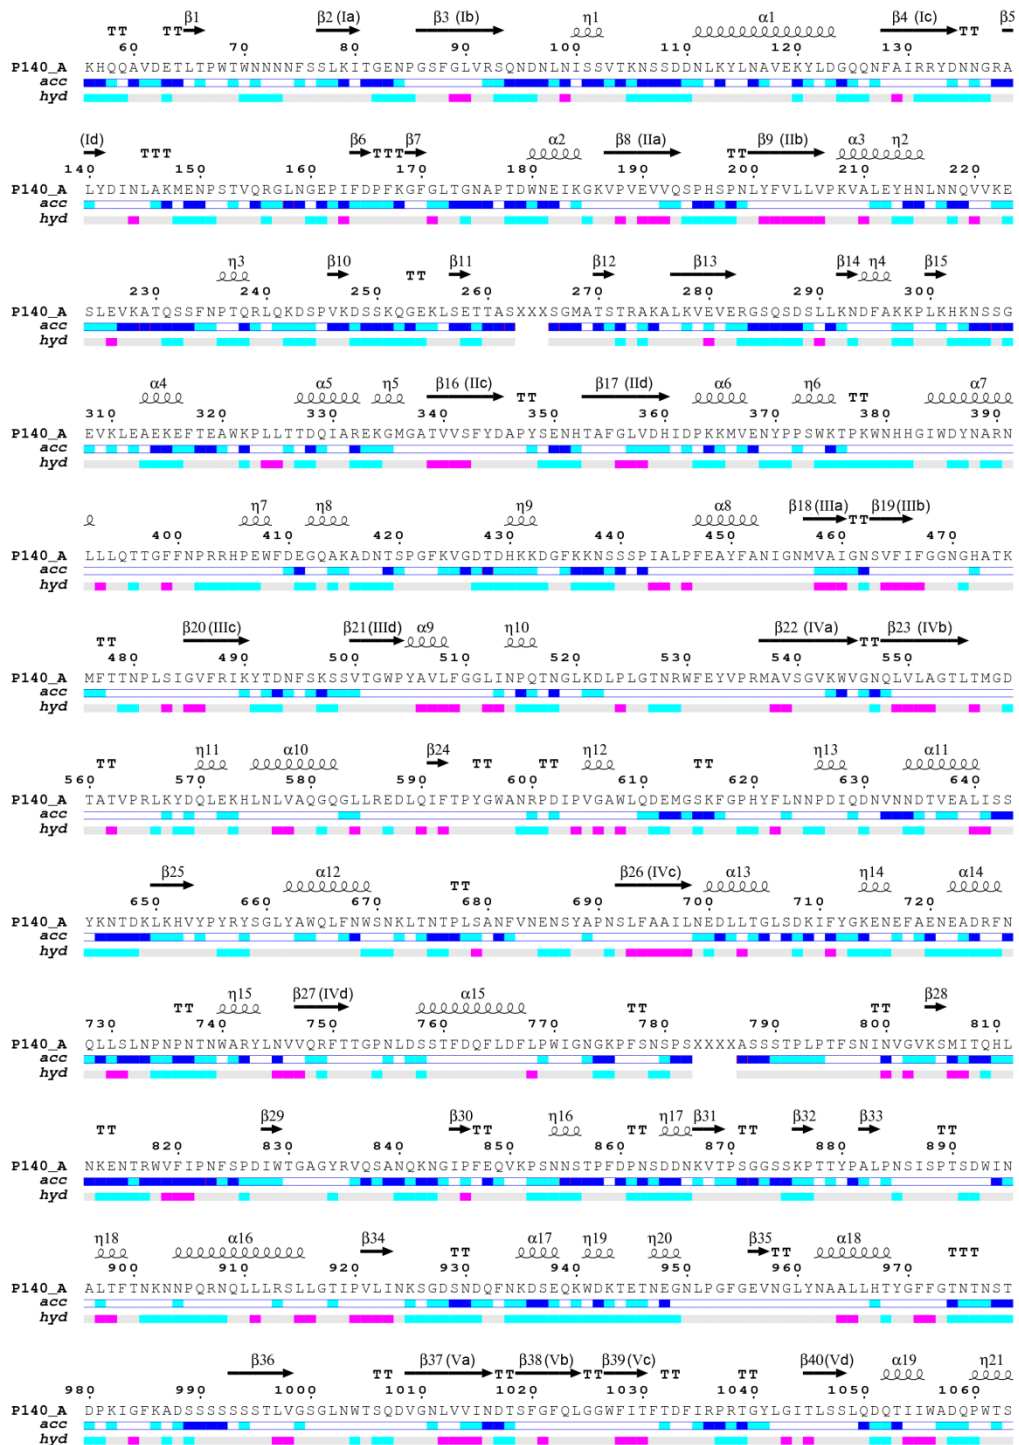

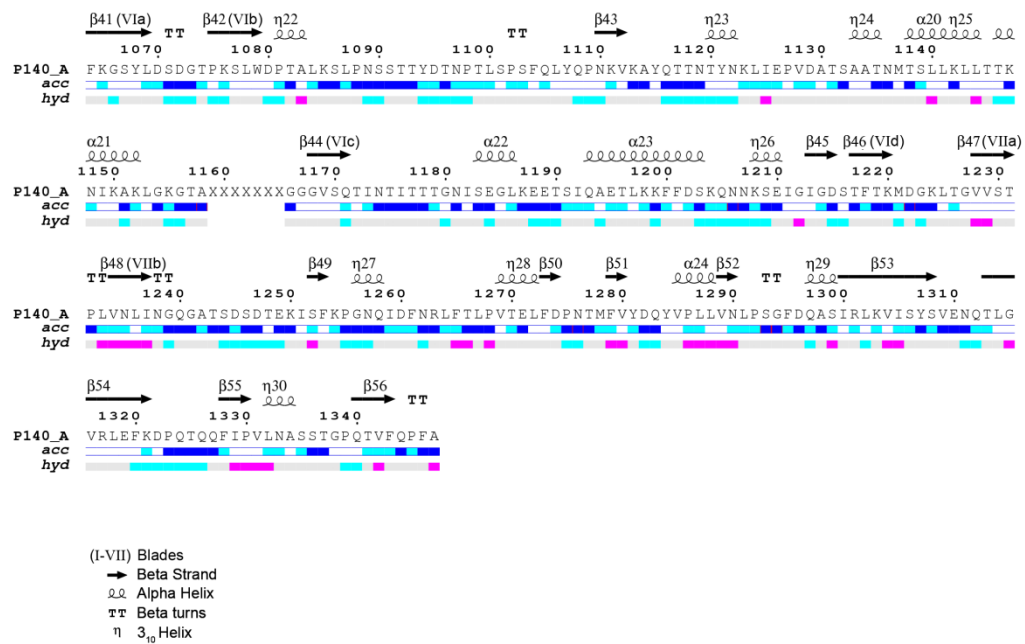

### Supplementary Figure 3. P140 sequence and secondary structural elements

Amino acid sequence of the extracellular region of P140, with the corresponding secondary structural elements (helices with squiggles, strands with arrows and turns with TT letters) (Endscript2<sup>2</sup>). The seven blades (or β-sheets) in the propeller are represented by roman numerals (I-VII). Bars below the sequence show solvent accessibility (blue is accessible, cyan is intermediate, white is buried) and hydrophathy (pink is hydrophobic, cyan is hydrophilic).

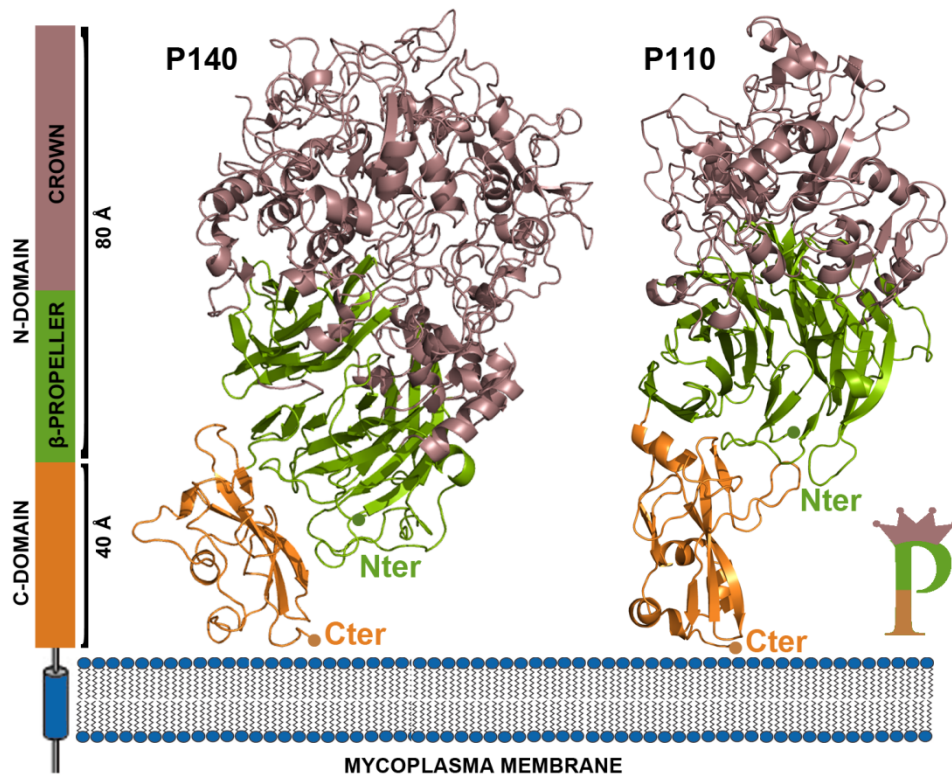

#### Supplementary Figure 4. Structural comparison of P140 and P110

P140 and P110 present a similar domain organization with small C-domains (orange) and large N-domains in the extracellular regions of the proteins. The N-terminal domains contain two distinct regions, a seven blade  $\beta$ -propeller (green) and a crown (brown), with the  $\beta$ -propellers situated between the C-terminal domains and the crowns. Also in both proteins, the C-terminal domains are followed in sequence by a (predicted) transmembrane helix and a cytosolic region with about a hundred residues.

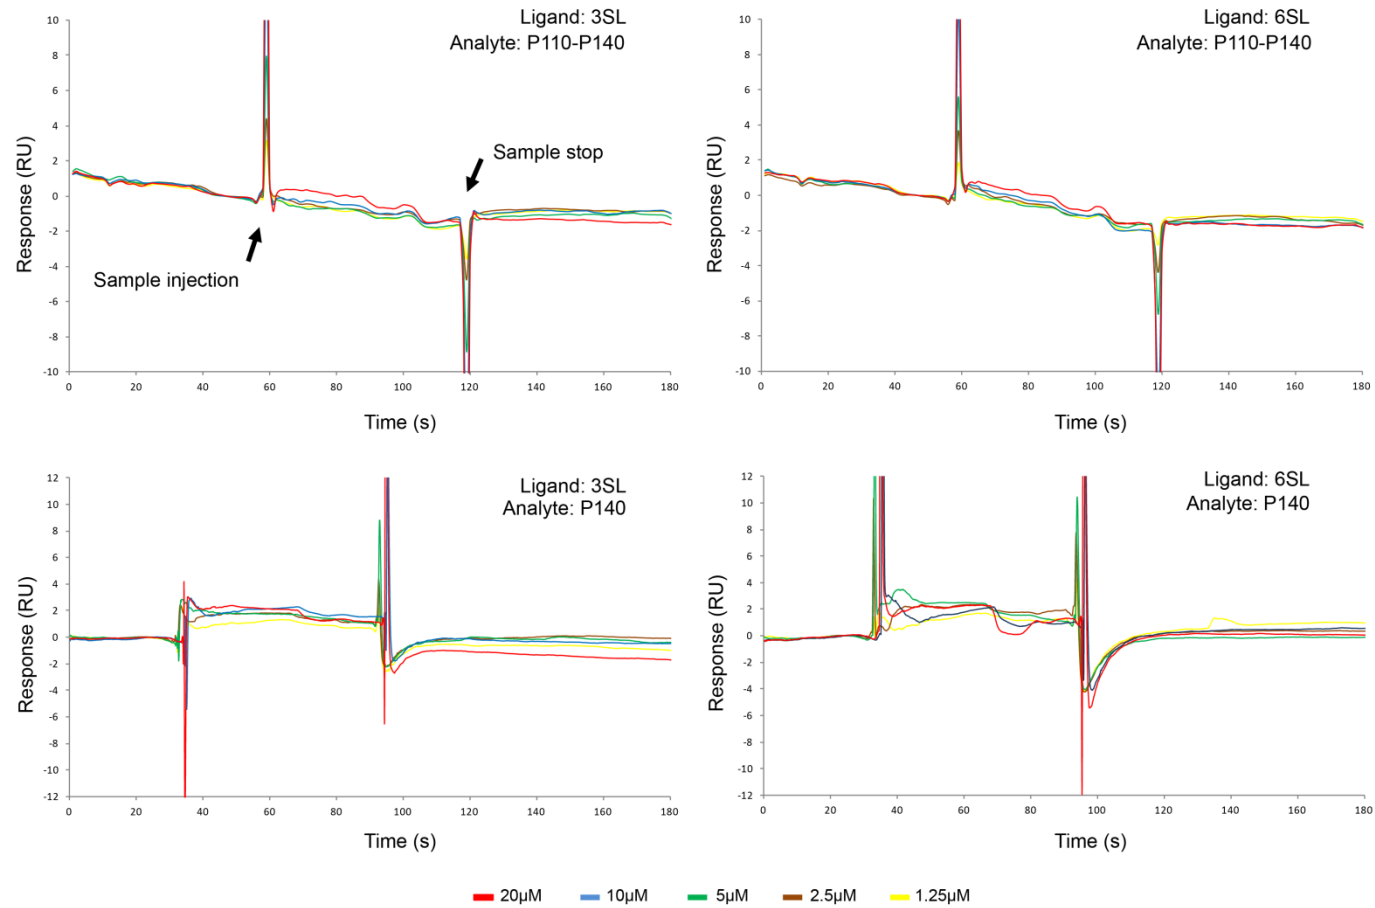

**Supplementary Figure 5. Surface Plasmon Resonance (SPR)**

Surface Plasmon Resonance sensorgrams showing no binding for the extracellular P140-P110 heterodimer (top panels) and for P140 (bottom panels) against increasing amounts of 3SL (left panels) and 6SL (right panels).

**a**

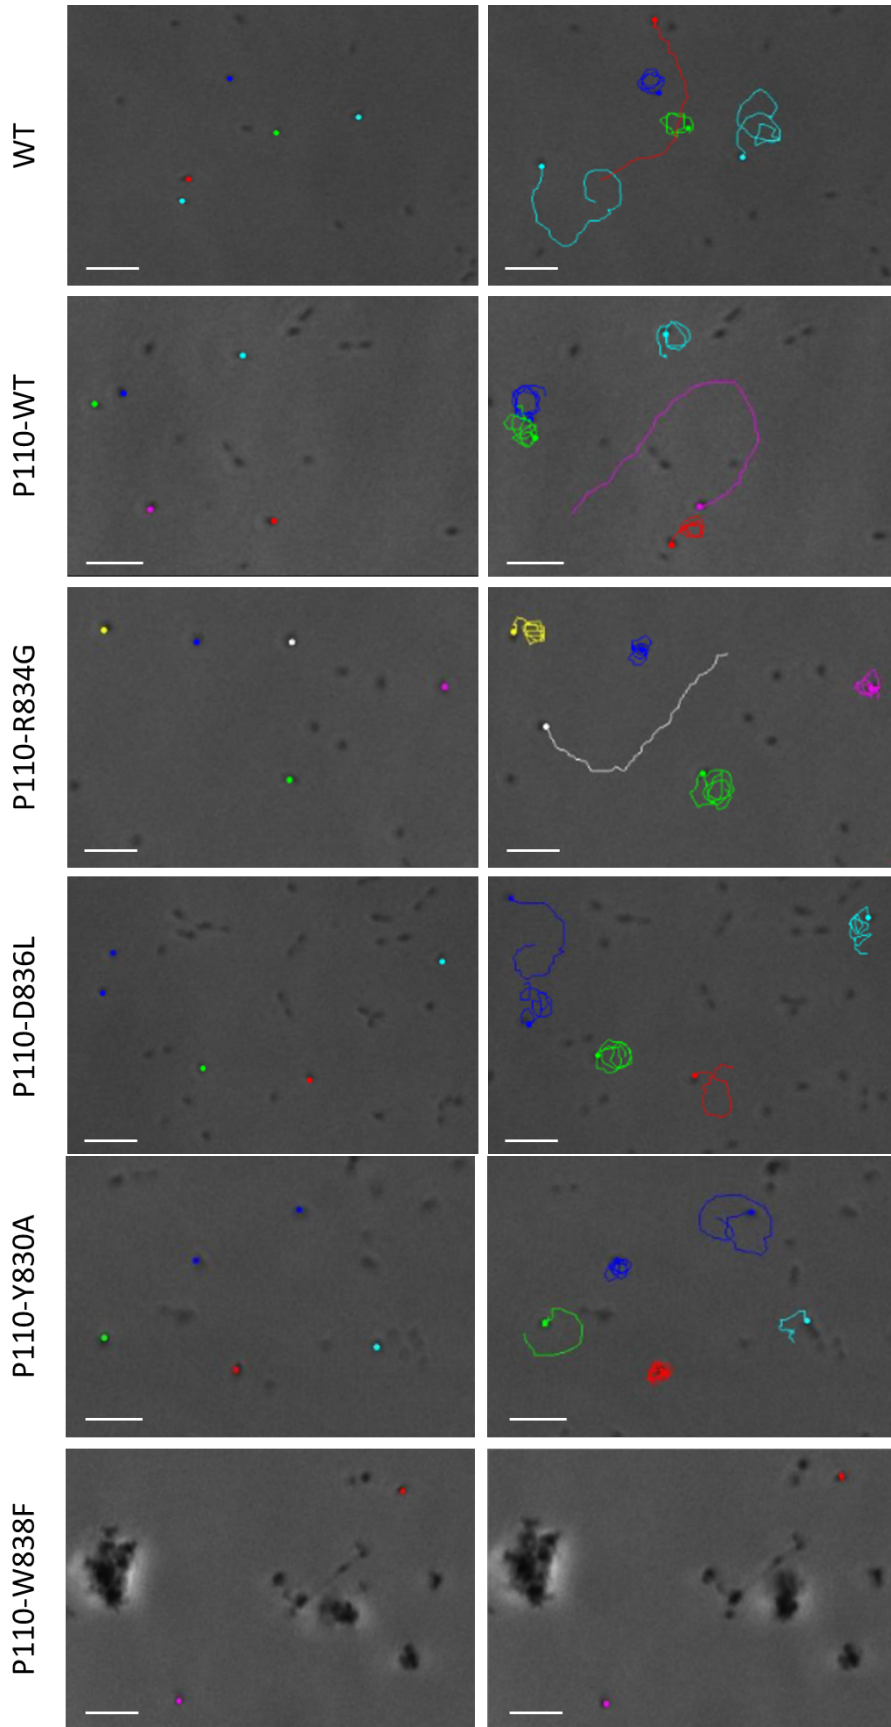

**b**



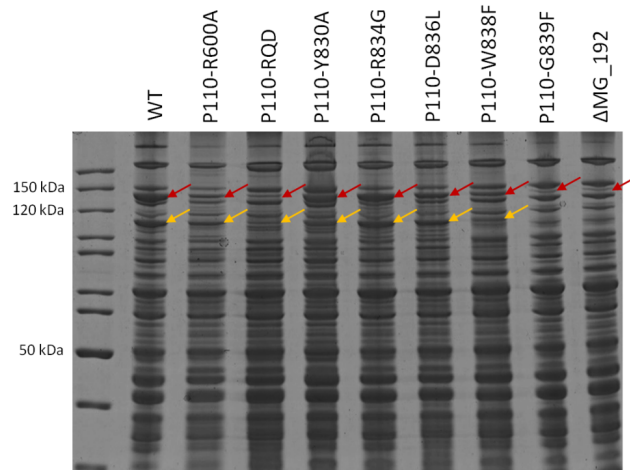

**Supplementary Figure 6. Time-lapse microcinematography and expression analysis for WT and selected strain variants**

a) Representative tracks of *M. genitalium* G37 Wild Type (WT) and P110-WT cells, and P110-R834G, P110-D836L, P110-Y830A and P110-W838F mutant cells. Although cells from P110-W838F were found to have severe hemadsorption deficiencies by flow cytometry, these cells attached properly to the plastic surface of Ibidi slides. This behaviour is somewhat common and has been previously described<sup>3</sup>. Bar is 5  $\mu$ m. b) SDS-PAGE of whole cell lysates from the WT and the different adhesin mutants. Red and orange arrows indicate the presence of P140 and P110, respectively. Between two and four independent clones from each strain were analysed by SDS-PAGE and representative clones from each strain are shown here (original SDS-PAGE is provided independently).

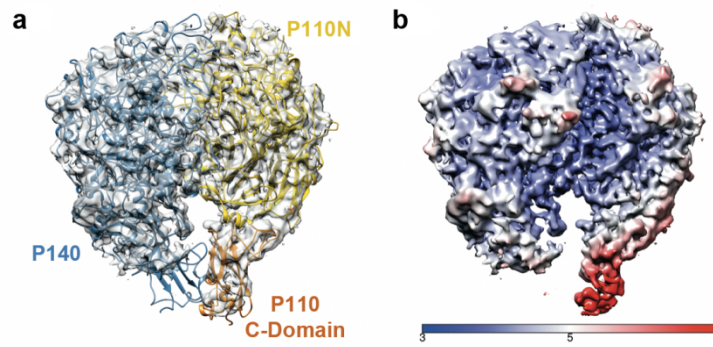

**Supplementary Figure 7. Cryo-EM of the P140-P110 extracellular region**

a) Cryo-EM map of the extracellular region of the P140-P110 heterodimer. The structure of P140-P110N, fitted into the map density, is also shown with P140 in blue and P110 in yellow. There is no density for the C-domain of P140, while density is visible, although weak, for the C-domain of P110 that was fitted independently into the cryo-EM map (orange). b) Local resolution of the cryo-EM map. The lowest resolution corresponds to the C-terminal domains, which indicates a significant flexibility of these domains, in particular of the C-terminal domain from P140, with respect to the bulkier N-domains.

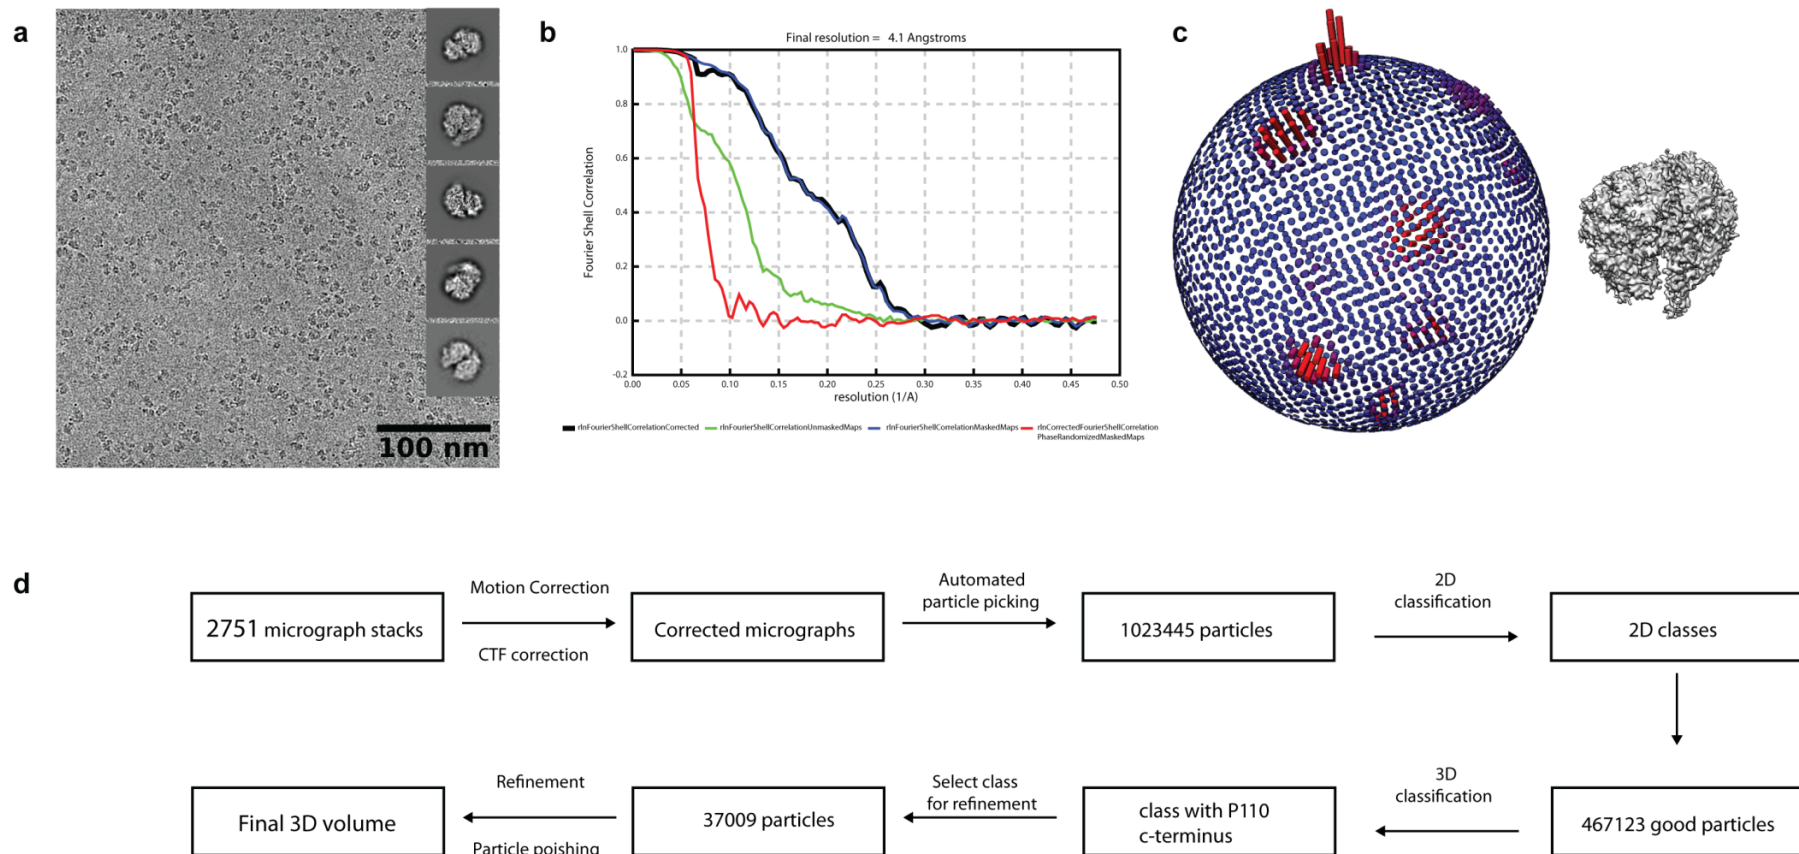

**Supplementary Figure 8. Processing of Cryo-EM data from the extracellular regions of P140-P110** a) Representative cryo-electron micrograph of P140-P110 heterodimers with a subset of 2D classes as insets (2751 micrographs were recorded in total). b) Fourier shell correlation showing a resolution of 4.1 Å using the 0.143 criteria. c) Angular distribution plot of images corresponding to the final 3D volume that displays anisotropy. d) Flowchart showing the processing pipeline from the micrograph stacks to the final 3D volume.

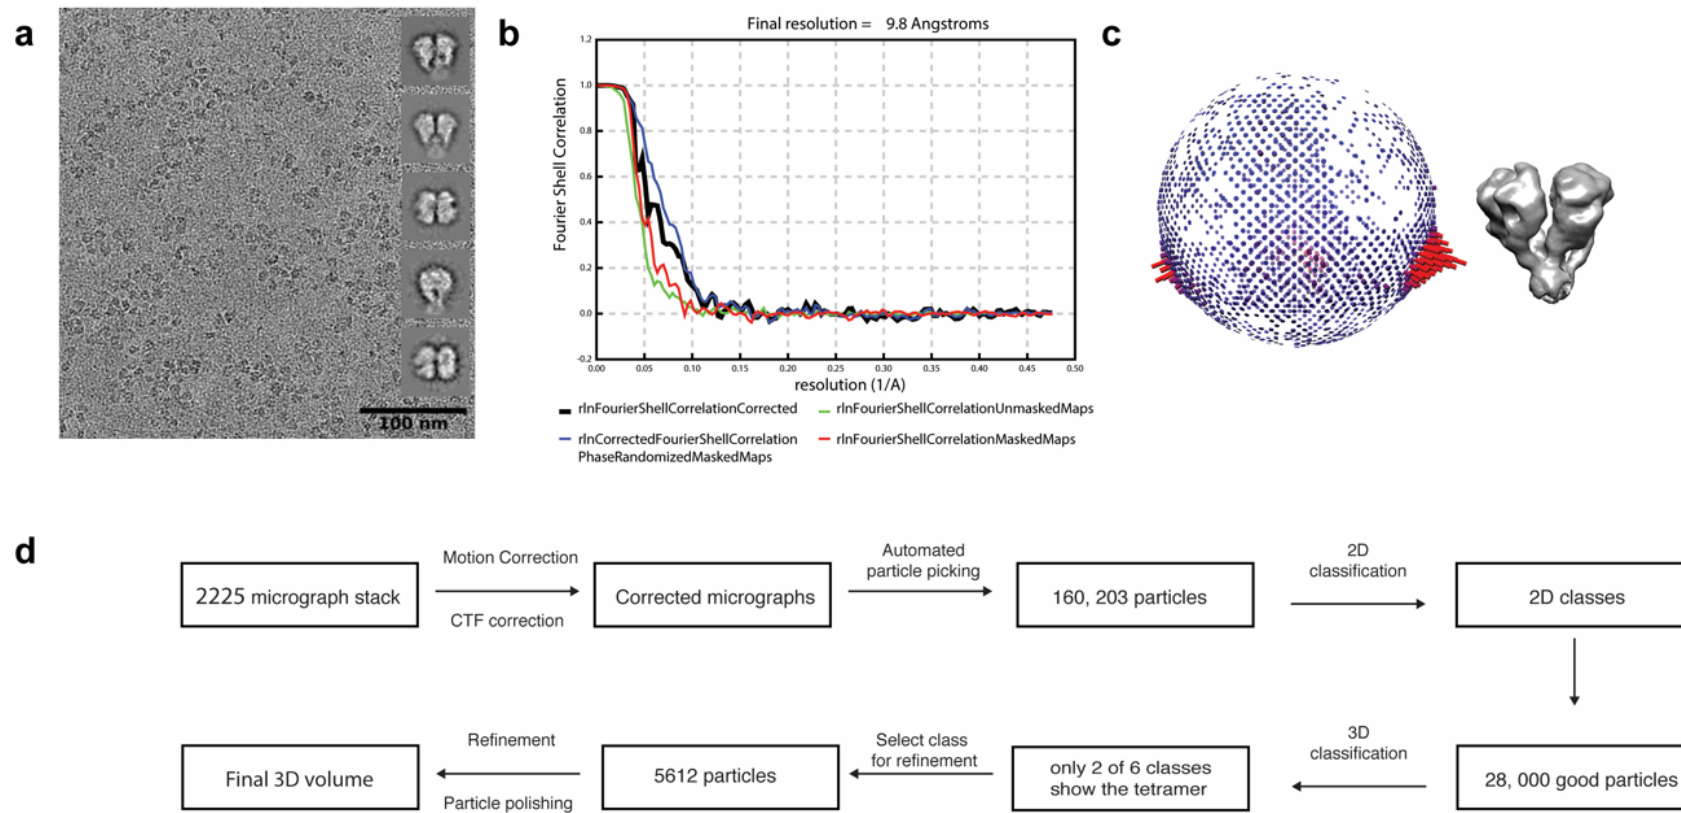

**Supplementary Figure 9. Image and data cryo-EM processing of the Nap complex** a) Representative cryo-electron micrograph of Nap complexes with a subset of 2D classes as insets (2225 micrographs were recorded in total). b) Fourier shell correlation of the cryo-EM map showing a resolution of 9.8 Å. c) Angular distribution plot of the final 3D volume. d) Flowchart showing the processing pipeline from the micrograph stacks to the final 3D volume.

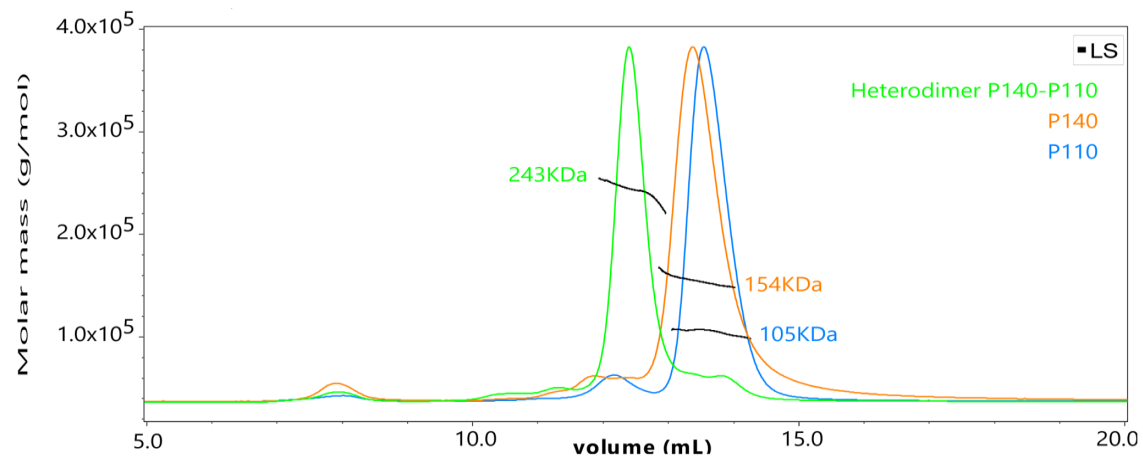

**Supplementary Figure 10. SEC-MALS measurements**

MALS measurements indicate that essentially only heterodimers are detected when mixing equimolar amounts of P110 and P140.

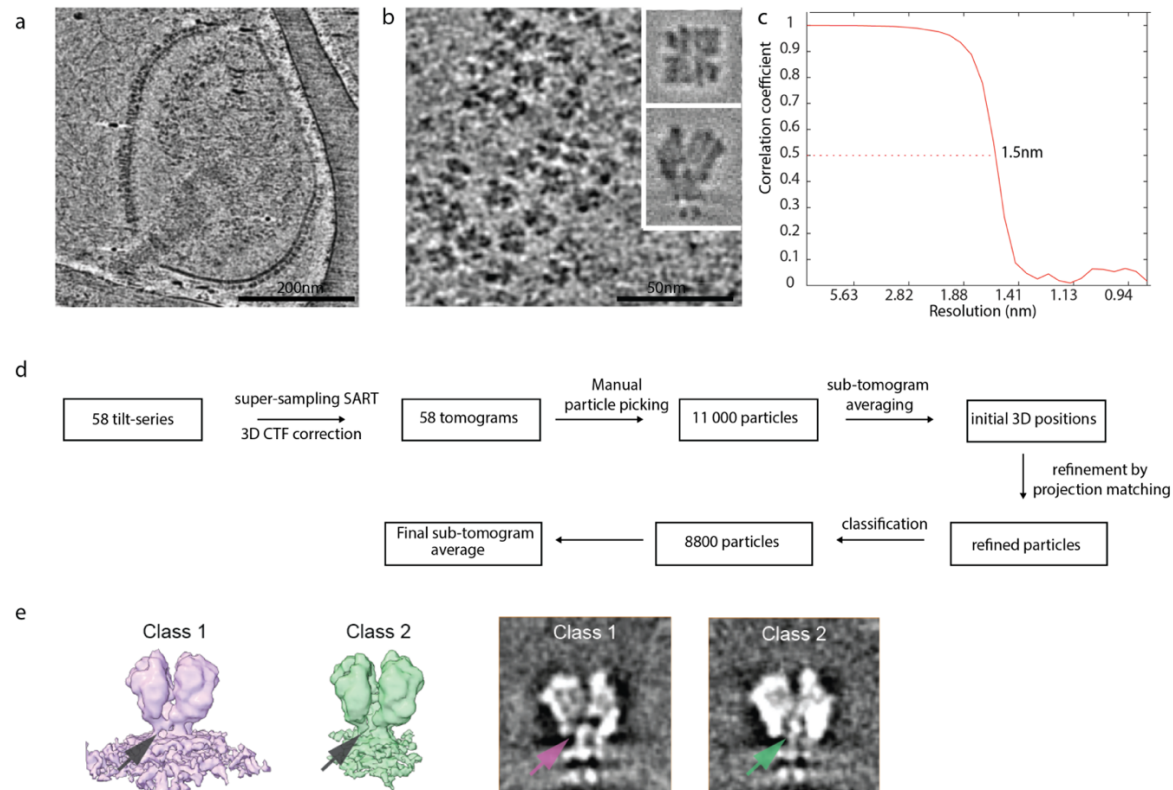

**Supplementary Figure 11. Cryo-ET of *M. genitalium* cells.** a) A 0.88 nm thick slice through a representative tomogram (58 tomograms were used in total) of a detergent-permeabilized *M. genitalium* cell. b) A zoomed in top view of the Nap complexes found on the cell in (a). Insets show slices through the top view (upper inset) and side view (lower-inset) of the sub-tomogram average. c) Fourier shell correlation of the sub-tomogram average showing a resolution of 15 Å at the 0.5 criterion. d) Flowchart showing the processing pipeline from the raw tilt-series to the final sub-tomogram average. e) Different classes observed during subtomogram averaging, class 1 (in purple) shows well resolved stalks (arrows), whereas class 2 (in green) shows less well-resolved stalks. Particles from class 1 were used in the final average.

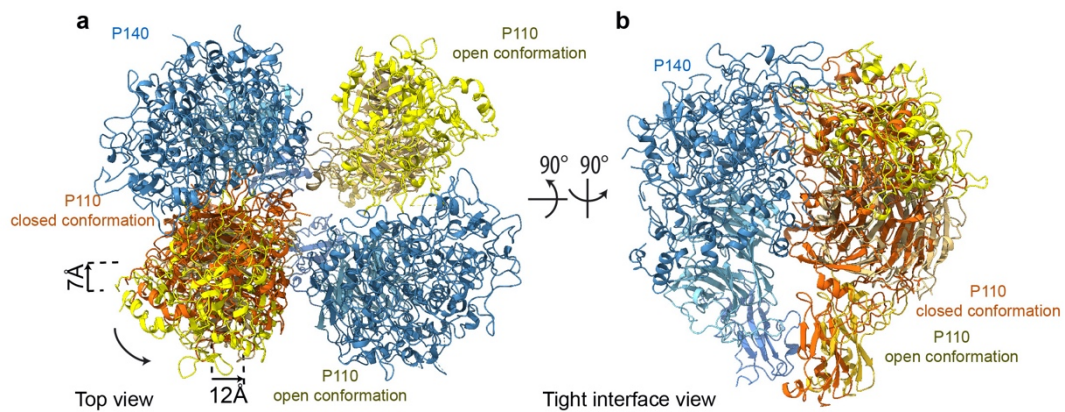

**Supplementary Figure 12. Transition between the open and closed conformations through the movement of P110.**

(a) Top view and (b) a tight interface view of a dimer of P140-P110 heterodimers showing the relative movement of P110 from the closed conformation (orange) as it retracts 7Å from its position at the tight interface and moves 12 Å closer to P140 across the loose interface to form the open conformation (yellow). P140 (blue) is kept unchanged as a reference.

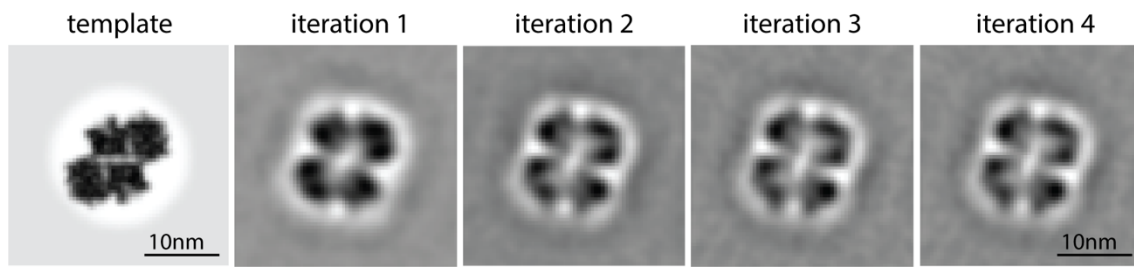

**Supplementary Figure 13. Sub-tomogram averaging experiment using the crystal structure tetramer as a starting reference**

When using the 'closed' tetramer structure (crystal structure packing unit) as a starting reference, the sub-tomogram averaging procedure still converges to the open structure after 5 iterations. Scale bar is 10 nm.



## Supplementary Tables

| <i>Data collection and Refinement Statistics</i> <sup>(a)</sup>                                                                                                                                                                                                                                                   |                         |                         |
|-------------------------------------------------------------------------------------------------------------------------------------------------------------------------------------------------------------------------------------------------------------------------------------------------------------------|-------------------------|-------------------------|
|                                                                                                                                                                                                                                                                                                                   | <b>P140</b>             | <b>P140-P110N</b>       |
| <i>Data collection</i>                                                                                                                                                                                                                                                                                            |                         |                         |
| Space group                                                                                                                                                                                                                                                                                                       | C2                      | P2 <sub>1</sub>         |
| Cell dimensions                                                                                                                                                                                                                                                                                                   |                         |                         |
| a,b,c (Å)                                                                                                                                                                                                                                                                                                         | 459.19, 116.65, 285.64  | 150.99, 157.28, 192.36  |
| α,β,γ (°)                                                                                                                                                                                                                                                                                                         | 90.00, 124.20, 90.00    | 90.00, 93.81, 90.00     |
| Unique reflections                                                                                                                                                                                                                                                                                                | 123183 (6159)           | 189359 (784)            |
| Resolution (Å)                                                                                                                                                                                                                                                                                                    | 189.88-3.26 (3.58-3.26) | 157.28-2.65 (2.70-2.65) |
| Wavelength (Å)                                                                                                                                                                                                                                                                                                    | 0.9791                  | 0.9789                  |
| R <sub>meas</sub> (%) <sup>b</sup>                                                                                                                                                                                                                                                                                | 0.15 (0.67)             | 0.58 (2.11)             |
| I/σI                                                                                                                                                                                                                                                                                                              | 5.8 (1.6)               | 6.6 (1.5)               |
| CC(1/2)                                                                                                                                                                                                                                                                                                           | 0.98 (0.74)             | 0.87 (0.343)            |
| Completeness (Spherical)                                                                                                                                                                                                                                                                                          | 63.5 (13.2)             | 73.3 (6.1)              |
| Completeness (Ellipsoidal)                                                                                                                                                                                                                                                                                        | 86.1 (57.9)             | 90.8 (44.4)             |
| Redundancy                                                                                                                                                                                                                                                                                                        | 3.1 (2.6)               | 6.8 (6.8)               |
| <i>Refinement Statistics</i>                                                                                                                                                                                                                                                                                      |                         |                         |
| Resolution                                                                                                                                                                                                                                                                                                        | 37.36-3.26              | 121.66-2.65             |
| Num. of reflections                                                                                                                                                                                                                                                                                               | 123103                  | 189358                  |
| R <sub>work</sub> (%) <sup>c</sup>                                                                                                                                                                                                                                                                                | 18.4                    | 18.70                   |
| R <sub>free</sub> (%) <sup>d</sup>                                                                                                                                                                                                                                                                                | 20.5                    | 22.4                    |
| No. residues                                                                                                                                                                                                                                                                                                      | 1292                    | 2134                    |
| No. ligands                                                                                                                                                                                                                                                                                                       | 0                       | 0                       |
| Solvent content (%)                                                                                                                                                                                                                                                                                               | 67.36                   | 46                      |
| Av. B-factor (Å <sup>2</sup> )                                                                                                                                                                                                                                                                                    | 80.85                   | 40.36                   |
| Coor. Error (Å) <sup>e</sup>                                                                                                                                                                                                                                                                                      | 0.42                    | 0.36                    |
| Rms dev.bonds (Å)                                                                                                                                                                                                                                                                                                 | 0.01                    | 0.01                    |
| Rms dev.angles (°)                                                                                                                                                                                                                                                                                                | 1.27                    | 1.25                    |
| <sup>a</sup> Values in parentheses correspond to the highest resolution shell.                                                                                                                                                                                                                                    |                         |                         |
| <sup>b</sup> $R_{\text{sym}} = \sum_{\text{hkl}} \sum_i  I_i(\text{hkl}) - \langle I(\text{hkl}) \rangle  / \sum_{\text{hkl}} \sum_i I_i(\text{hkl})$ , where $I_i(\text{hkl})$ is the intensity of an observation and $\langle I(\text{hkl}) \rangle$ is the mean value of observations for a unique reflection. |                         |                         |
| <sup>c</sup> $R_{\text{cryst}} = \sum_h  F_o(\mathbf{h}) - F_c(\mathbf{h})  / \sum_h  F_o(\mathbf{h}) $ , where $F_o$ and $F_c$ are the observed and calculated structure-factor amplitudes, respectively.                                                                                                        |                         |                         |
| <sup>d</sup> $R_{\text{free}}$ was calculated with 5% of data, which was excluded from the refinement.                                                                                                                                                                                                            |                         |                         |
| <sup>e</sup> Based on maximum likelihood.                                                                                                                                                                                                                                                                         |                         |                         |

Supplementary Table 1. Data collection and refinement statistics

|                                                 | <b>P140-P110N</b> | <b>NAP complex</b> |
|-------------------------------------------------|-------------------|--------------------|
| <b>Data collection</b>                          |                   |                    |
| <b>Microscope</b>                               | FEI Titan Krios   | FEI Titan Krios    |
| <b>Detector</b>                                 | Gatan K2 Summit   | Gatan K2 Summit    |
| <b>Acquisition software</b>                     | SerialEM 3.7      | SerialEM 3.7       |
| <b>Magnification</b>                            | 130,000x          | 130,000x           |
| <b>Pixel size (Å)</b>                           | 1,05              | 1,05               |
| <b>Total electron dose (e- / Å<sup>2</sup>)</b> | 50                | 50                 |
| <b>Dose rate (Å<sup>2</sup> / s-1)</b>          | 7,7               | 7,4                |
| <b>number of frames</b>                         | 32                | 34                 |
| <b>Defocus range (µm)</b>                       | -1 to -4          | -1 to -4           |
| <b>Micrographs used</b>                         | 2.751             | 2.225              |
| <b>Processing</b>                               |                   |                    |
| <b>Software</b>                                 | Relion 3.0 beta   | Relion 3.0 beta    |
| <b>Motion correction</b>                        | UCSF MotionCor2   | UCSF MotionCor2    |
| <b>CTF estimation</b>                           | GCTF v 1.06       | GCTF v 1.06        |
| <b>Total extracted particles</b>                | 1.024.402         | 160.203            |
| <b>After 2D Classification</b>                  | 467.123           | 28.000             |
| <b>Number of 3D classes</b>                     | 6                 | 6                  |
| <b>Number of refined particles</b>              | 37.009            | 5.612              |
| <b>Symmetry</b>                                 | /                 | C2                 |
| <b>Map sharpening B factor (Å<sup>2</sup>)</b>  | -78               | -218               |
| <b>Resolution FSC 0.143 (Å)</b>                 | 4,1               | 9,8                |

**Supplementary Table 2. Single particle analysis data collection**

| Correlation#/clash-score <sup>^</sup> |                                    |                                        |                                      |
|---------------------------------------|------------------------------------|----------------------------------------|--------------------------------------|
|                                       | Cryo-EM<br>(P140-P110 heterodimer) | Cryo-EM<br>("Closed" Nap conformation) | Cryo-ET<br>("Open" Nap conformation) |
| P140                                  | 0.74 / 13.55                       | -                                      | -                                    |
| P110                                  | 0.73 / 13.55                       | -                                      | -                                    |
| P140                                  | -                                  | 0.95 / 12.13                           | 0.94 / 10.39                         |
| P110                                  | -                                  | 0.94 / 12.42                           | 0.94 / 10.39                         |

# Real-space correlation of the fitted models into the corresponding electron density maps. Fitting was based on the local optimisation algorithm of Chimera<sup>4</sup>

<sup>^</sup>The "clash-score" is defined as the number of serious overlaps (> 0.4 Å) per 1000 atoms (Molprobit<sup>5</sup>).

**Supplementary Table 3. Correlation and clash-score values from rigid-body fitted crystal structures**

| Strain Name     | Genotype                                                                                                   | Reference            |
|-----------------|------------------------------------------------------------------------------------------------------------|----------------------|
| G37             | Wild-type                                                                                                  | ATCC 33530           |
| $\Delta$ MG_192 | Deletion of the MG_192 gene by allelic exchange (G37 $\Delta$ MG_192:: <i>tetM438</i> )                    | Burgos et al. 2006   |
| P110-WT         | Re-introduction of a MG_192 wild-type allele in a $\Delta$ MG_192 mutant                                   | Aparicio et al. 2018 |
| P110-R600A      | Introduction of a MG_192 allele bearing a R600A substitution in a $\Delta$ MG_192 mutant                   | This work            |
| P110-RQD        | Introduction of a MG_192 allele bearing a R600A, Q460A and D461A substitutions in a $\Delta$ MG_192 mutant | This work            |
| P110-Y830A      | Introduction of a MG_192 allele bearing a Y830A substitution in a $\Delta$ MG_192 mutant                   | This work            |
| P110-R834G      | Introduction of a MG_192 allele bearing a R834G substitution in a $\Delta$ MG_192 mutant                   | This work            |
| P110-D836L      | Introduction of a MG_192 allele bearing a D836L substitution in a $\Delta$ MG_192 mutant                   | This work            |
| P110-W838F      | Introduction of a MG_192 allele bearing a W838F substitution in a $\Delta$ MG_192 mutant                   | This work            |
| P110-G389F      | Introduction of a MG_192 allele bearing a G389F substitution in a $\Delta$ MG_192 mutant                   | This work            |

**Supplementary Table 4. Strains used in this study**

| Strain     | n    | Motile cells (%) | Velocity ( $\mu\text{m/s}$ ) <sup>a</sup> | Motility loss (%) |
|------------|------|------------------|-------------------------------------------|-------------------|
| G37 (WT)   | ~250 | 88               | 0.126 $\pm$ 0.002                         | -                 |
| P110-WT    | ~250 | 77               | 0.119 $\pm$ 0.014                         | 5.6               |
| P110-Y830A | ~250 | 78               | 0.100 $\pm$ 0.011*                        | 20.6              |
| P110-R834G | ~250 | 86               | 0.114 $\pm$ 0.007                         | 9.5               |
| P110-D836L | ~250 | 86               | 0.102 $\pm$ 0.009*                        | 19.0              |
| P110-W838F | ~64  | 0                | 0                                         | 100               |

<sup>a</sup>Velocities are shown as mean values  $\pm$  standard error. n=25 biologically independent cells, from different fields, different preparations and different microcinematographies.

\* Statistically significant values (T(25)=2.06; p<0.05). Statistical significance was assessed with the Paired Student's two-sided T test.

| Strain     | Difference of means | Confidence interval (+/-) | Effect size | Degrees of freedom | p-value |
|------------|---------------------|---------------------------|-------------|--------------------|---------|
| WT         | -                   | -                         | -           | -                  | -       |
| P110-WT    | 0.007               | 0.01663                   | 0.16286     | 24                 | 0.57    |
| P110-Y830A | 0.026               | 0.01522                   | 0.69427     | 24                 | 0.02    |
| P110-R834G | 0.012               | 0.00988                   | 0.48446     | 24                 | 0.10    |
| P110-D836L | 0.024               | 0.01230                   | 0.81200     | 24                 | 0.01    |
| P110-W838F | -                   | -                         | -           | -                  | -       |

**Supplementary Table 5. Gliding motility parameters of *M. genitalium* G37 wild-type cells and all different mutant strains.**



| Primer name       | Sequence                                                                                                      |
|-------------------|---------------------------------------------------------------------------------------------------------------|
| COMmg192-F        | AGTGGGCCCCTAACAACAAAAACAAATTAGTGATGTTGTTAGTGAT<br>TGTGTGAAAAAATTGTTTATAATTAAGTTTGTATGAAAAACAATG<br>AGAAAAACAG |
| COMmg192-R        | AGTCTCGAGCTAACTTTTGGTTTCTTCTG                                                                                 |
| R600Amg192-F      | CCTGAAAACGCGGGTGCTAGT                                                                                         |
| R600Amg192-R      | ACTAGCACCCGCGTTTTTCAGG                                                                                        |
| Q460AD461Amg192-F | AGTTTTTCAATCGCTGCCACCTTCAGCTTTG                                                                               |
| Q460AD461Amg192-R | AAAGCTGAAGGTGGCAGCGATTGAAAAACTCCC                                                                             |
| Y830Amg192-F      | GGTTAGCACCTAGTGCCACAGAAAACAGGG                                                                                |
| Y830Amg192-R      | CCCTGTTTTCTGTGGCACTAGGTGCTAACC                                                                                |
| R834Gmg192-F      | GTTACACAGAAAACGGGGTTGATGCATGGG                                                                                |
| R834Gmg192-R      | CCCATGCATCAACCCCGTTTTCTGTGTAAC                                                                                |
| D836Lmg192-F      | CAGAAAACAGGGTTTTGGCATGGGGTAAAG                                                                                |
| D836Lmg192-R      | CTTTACCCCATGCCAAAACCCTGTTTTCTG                                                                                |
| W838Fmg192-F      | GTTGATGCATTTGGTAAAGTTG                                                                                        |
| W838Fmg192-R      | CAACTTTACCAAATGCATCAAC                                                                                        |
| G839Fmg192-F      | GATGCATGGTTTAAAGTTGAG                                                                                         |
| G839Fmg192-R      | CTCAACTTTAAACCATGCATC                                                                                         |
| PacUp             | GTAGCTAATCTAACAGTAGG                                                                                          |
| PacDw             | GTCCTAGAACTTGGTGTATG                                                                                          |
| RTPCRmg192-F      | TCCCCTAATGAATTGCGAAG                                                                                          |
| RTPRCmg192-R      | CAGGGGCAATTGATTTAAGC                                                                                          |
| Tnp3              | GATTCATGATTATATCGATCAAC                                                                                       |
| P110-F            | AGGAGATATACCATGGCACTGGCAAATACCTTTC                                                                            |
| P110-R            | GTGATGGTGATGTTTAGGCAGTGCTGCAAAC                                                                               |
| P110N-F           | AGGAGATATACCATGGCACTGGCAAATACCTTTC                                                                            |
| P110N-R           | GTGATGGTGATGTTTTGCCAGACCACCATTATTGG                                                                           |
| P140-F            | AGGAGATATACCATGGGTGTTATTACCGGTGTTG                                                                            |
| P140-R            | GTGATGGTGATGTTTATCTGCCCACTGATTAAACG                                                                           |

**Supplementary Table 7. Primers used in this study**

## References

1. Jones, D.T. Protein secondary structure prediction based on position-specific scoring matrices. *J Mol Biol* **292**, 195-202 (1999).
2. Robert, X. & Gouet, P. Deciphering key features in protein structures with the new ENDscript server. *Nucleic acids research* **42**, W320-W324 (2014).
3. Aparicio, D. et al. Mycoplasma genitalium adhesin P110 binds sialic-acid human receptors. *Nature Communications* **9**, 4471 (2018).
4. Pettersen, E.F. et al. UCSF Chimera--a visualization system for exploratory research and analysis. *J Comput Chem* **25**, 1605-12 (2004).
5. Davis, I.W., Murray, L.W., Richardson, J.S. & Richardson, D.C. MOLPROBITY: structure validation and all-atom contact analysis for nucleic acids and their complexes. *Nucleic Acids Res* **32**, W615-9 (2004).
